# Supplementary material for: Performance improvement of aqueous zinc batteries by zinc oxide and Ketjen black co-modified glass fiber separators
Source: Royal Society of Chemistry journal article supplement (doi:10.1039/d2ra07745k), 2023-01-01
Supplement: d2ra07745k1.pdf [file d2ra07745k1.pdf]

## Supporting Information

### Performance improvement of aqueous zinc batteries by zinc oxide and Ketjen Black co-modifying glass fiber separators

Gang Lin,<sup>a</sup> Xiaoliang Zhou,<sup>\*a,c</sup> Limin Liu,<sup>\*a,c</sup> Huangmin Li,<sup>a</sup> Di Huang,<sup>a</sup> Jing Liu,<sup>a</sup> Jie Li<sup>a</sup> and  
Zhaohuan Wei<sup>\*b</sup>

<sup>a</sup> College of Chemistry and Chemical Engineering, Southwest Petroleum University, Chengdu,  
610500, PR China.

<sup>b</sup> School of Physics, University of Electronic Science and Technology of China, Chengdu,  
611731, PR China.

<sup>c</sup> Tianfu Yongxing Laboratory, Chengdu, PR China.

\*Corresponding author. Tel.: +86 18884274920

E-mail address: xlzhou\_swpu@sina.com (X.L. Zhou), liulimin\_ly@126.com (L.M. Liu),  
zhwei@uestc.edu.cn (Z.H. Wei)

In this study, all calculations were employed with spin-polarized DFT framework and implemented by the DMol<sup>3</sup> mode in Materials Studio software<sup>1,2</sup>. The generalized gradient approximation (GGA) with the Perdew-Burke-Ernzerh (PBE) functional was adopted to depict the electronic exchange-correlation effects<sup>3,4</sup>. The double numerical plus polarization (DNP) was chosen as the atomic orbital basis set. During the geometry optimization, the energy, force, and displacement convergence criteria were set to  $2 \times 10^{-5}$  Ha,  $4 \times 10^{-3}$  Ha Å<sup>-1</sup>, and  $5 \times 10^{-3}$  Å, respectively. A  $2 \times 2 \times 1$  Monkhorst-Pack grid was employed to execute the Brillouin-zone integrations. The (400) facets of ZnO and (100) facets of Zn were used during simulating. The adsorption energy ( $E_{\text{ads}}$ ) was calculated by the following equation:

$$E_{\text{ads}} = E_{\text{total}} - E_{\text{sub}} - E_{\text{Zn}}$$

$E_{\text{total}}$  represents the total energy of Zn(100) and ZnO(400) substrates combined with zinc atom.  $E_{\text{sub}}$  and  $E_{\text{Zn}}$  represent the energy of the substrate and the energy of zinc atom, respectively.

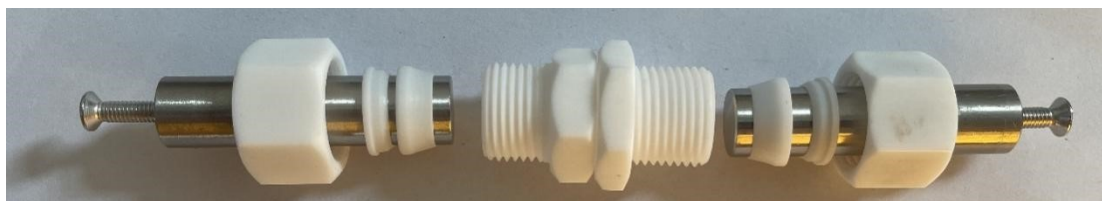

Fig. S1 The digital picture of the battery testing device used in this study.

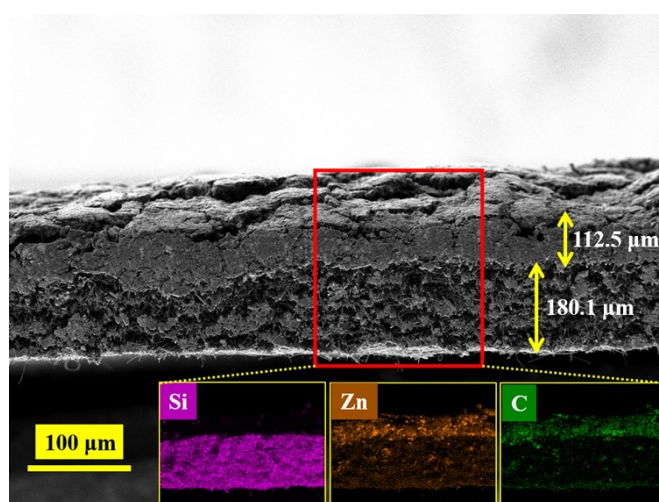

Fig.S2 the cross-section SEM image of the modified separator.

A cross-sectional SEM diagram of the modified separator has been added as requested by the reviewer, in Fig.S2. And this is described in the supporting information: The modified separator was put into the battery test device and sealed for 30 min, and then the cross-sectional SEM and EDS analysis were performed. The Si element belongs to glass fiber, and Zn and C belong to modified materials. It can be seen from the figure that a small amount of ZnO was found in the separator, but didn't penetrate through it, which is why the separator didn't cause a short circuit. According to the EDS results, the modified separator can be divided into two parts: 1) the separator with some ZnO and KB, with a thickness of 180.1  $\mu\text{m}$ ; 2) the modified layer of ZnO and KB not penetrated into the separator, with a thickness of 112.5  $\mu\text{m}$ .

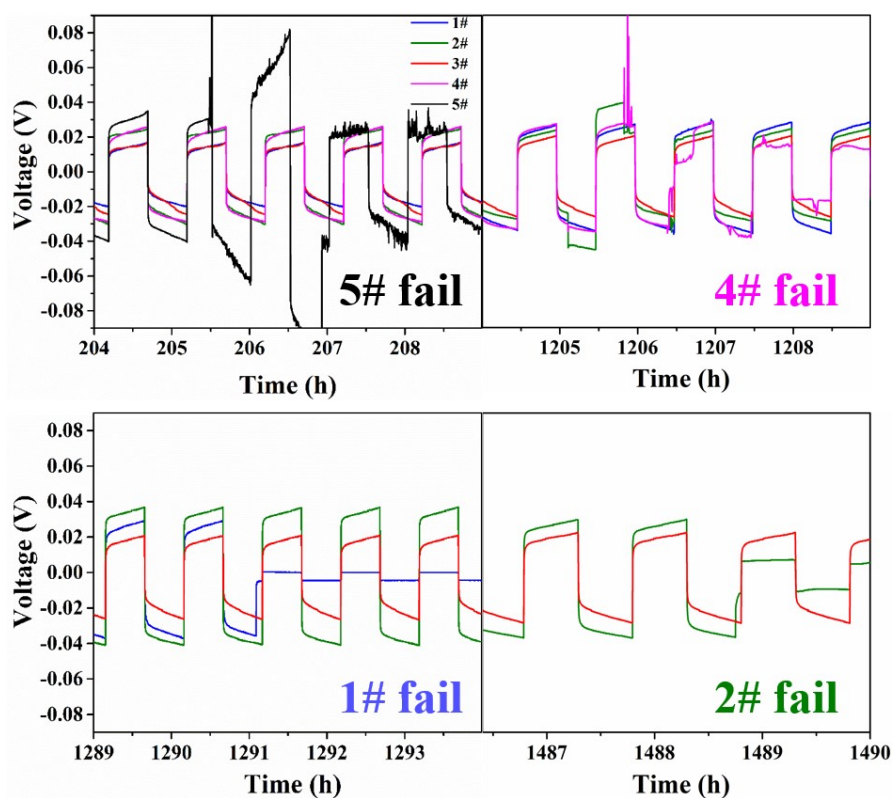

Fig. S3 The overpotential of 5#, 4#, 1# and 2# failed.

Table S1. The fitting results of EIS for different cells.

|                     | $R_e$ ( $\Omega$ ) | $R_s$ ( $\Omega$ ) | $R_{ct}$ ( $\Omega$ ) |
|---------------------|--------------------|--------------------|-----------------------|
| Bare                | 0.792              | 3.9                | 226.8                 |
| ZnO                 | 1.246              | 5.352              | 265.1                 |
| KB                  | 0.353              | 0.7255             | 121.4                 |
| Zn//ZnO-KB//Zn (3#) | 2.043              | 0.89               | 197.2                 |

Table S2 The EIS fitting results of Bare Zn//MnO<sub>2</sub> and Modified Zn//MnO<sub>2</sub>

|                               | $R_e$ ( $\Omega$ ) | $R_{ct}$ ( $\Omega$ ) |
|-------------------------------|--------------------|-----------------------|
| Bare Zn//MnO <sub>2</sub>     | 1.15               | 96                    |
| Modified Zn//MnO <sub>2</sub> | 0.468              | 2.557                 |

## References

1. B. J. Delley, *J. Chem. Phys.*, 2000, **113**, 7756-7764.
2. B. J. Delley, *J. Chem. Phys.*, 1990, **92**, 508-517.
3. J. P. Perdew, K. Burke and M. Ernzerhof, *Phys. Rev. Lett.*, 1998, **77**, 3865-3868.
4. J. P. Perdew and W. Yue, *Physical review. B, Condensed matter*, 1992, **45**, 13244-13249.
